# Supplementary material
Source: PubMed Central journal article supplement (PMC4073648)
Supplement: NIHMS591068-supplement-1.pdf [file NIHMS591068-supplement-1.pdf]

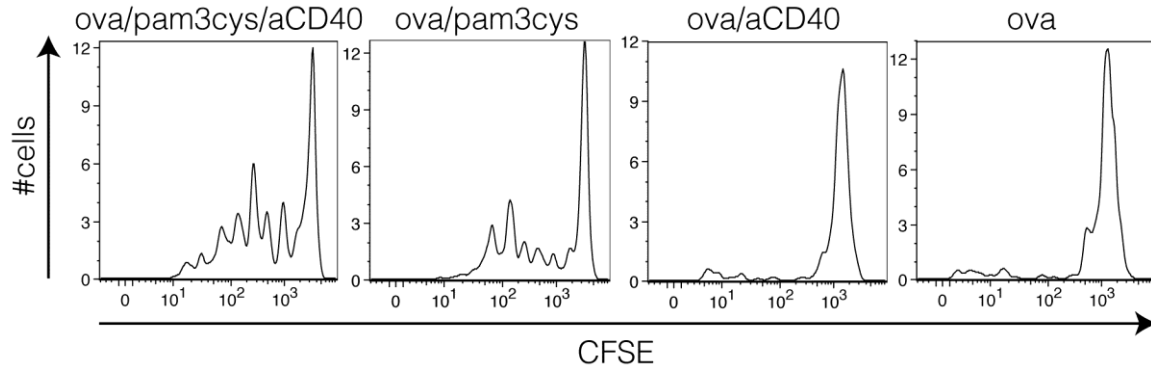

*Supplementary Fig. 1. TLR1/2 agonist, Pam3cys, elicits antigen persistence independent of anti-CD40. C57bl/6 mice were immunized with 10 $\mu$ g ova, 1 $\mu$ g Pam3Cys, and 1 $\mu$ g  $\alpha$ CD40 as indicated above each plot. One week after immunization congenically different CD45.1 OT1 T cells were labeled with CFSE and approximately 500,000 cells were transferred into each mouse. Three days after OT1 transfer mice were sacrificed and spleens were processed into a single cell suspension for staining and flow cytometry as in figures 1 and 2.*

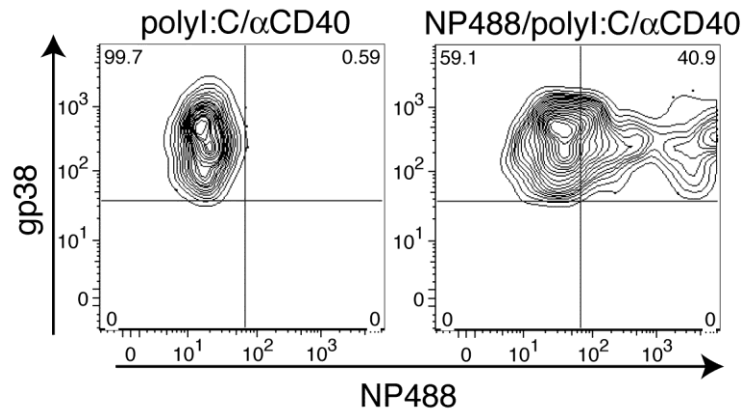

*Supplementary Fig. 2. Flu derived nucleoprotein (NP) persists on LECs. Mice were immunized subcutaneously with 1  $\mu$ g polyI:C, and 1  $\mu$ g  $\alpha$ CD40 with or without 10  $\mu$ g NP conjugated to Alexafluor-488 as indicated above the plot. One week after immunization mice were sacrificed and draining lymph nodes were digested and processed exactly as in figure 4.*

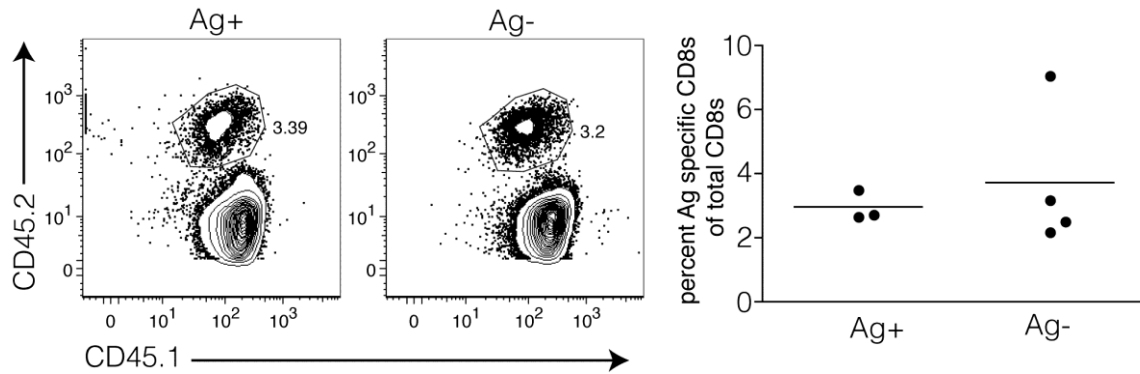

*Supplementary Fig. 3. Mice with or without archived antigen have similar amounts of circulating effector/memory T cells after transfer. CD45.1 gBT rag<sup>-/-</sup> mice were immunized subcutaneously with or without 100 $\mu$ g of the 3K peptide, 10 $\mu$ g polyI:C, and 10 $\mu$ g  $\alpha$ CD40 and 100 $\mu$ g ovalbumin (as in Fig 6). Simultaneously, CD45.1/2 V $\beta$ 5 mice were immunized with 100 $\mu$ g of ovalbumin, 50 $\mu$ g  $\alpha$ CD40, and 50 $\mu$ g polyI:C. 2 weeks later, CD8<sup>+</sup> T cells were isolated from the V $\beta$ 5 mice and 3x10<sup>4</sup> SIINFEKL-specific CD8 cells/recipient were transferred into the previously immunized CD45.1 gBTxrag<sup>-/-</sup> mice with (Ag<sup>+</sup>) or without (Ag<sup>-</sup>) ovalbumin archived on the LECs. Two weeks later (before LM-challenge) mice were bled and stained for flow cytometry. Shown are CD8<sup>+</sup>, B220<sup>-</sup> cells.*
